# Supplementary material for: Brain somatic mutations in MTOR reveal translational dysregulations underlying intractable focal epilepsy
Source: JCI journal article supplement (doi:10.1172/jci127032), 2019-09-04
Supplement: sd1 [file 1]

## Supplemental Figure 1

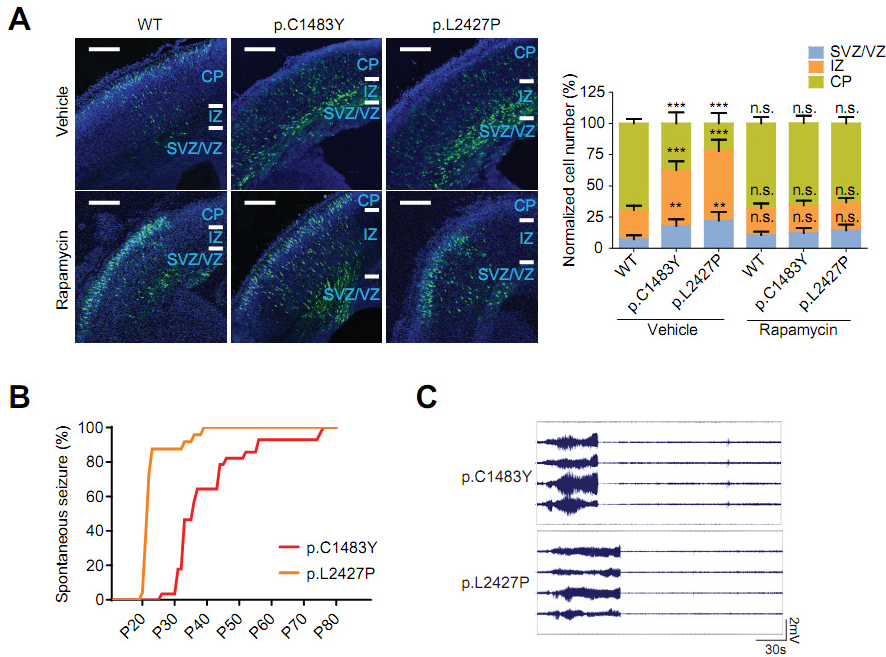

### Supplemental Figure 1. Major phenotypes of FMCD reversed by mTOR inhibitor rapamycin in FMCD mice.

(A) Representative immunofluorescence images of migration of *in utero* electroporated neurons. GFP-positive cells represent mTOR WT (WT), mTOR p.C1483Y (p.C1483Y), and mTOR p.L2427P (p.L2427P) carrying cortical neurons from vehicle-treated (top) and rapamycin-treated (bottom) FMCD mice at E18. \*\*  $P < 0.01$  and \*\*\*  $P < 0.001$  (WT-vehicle:  $n = 9$ , p.C1483Y-vehicle:  $n = 9$ , p.L2427P-vehicle:  $n = 11$ , WT-rapamycin:  $n = 8$ , p.C1483Y-rapamycin:  $n = 9$ , p.L2427P-rapamycin:  $n = 5$ , one-way analysis of variance [ANOVA] with Bonferroni post-hoc test). Scale bars, 200  $\mu\text{m}$ . Mean  $\pm$  SEM. CP: cortical plate, IZ: intermediate zone, SVZ/VZ: subventricular/ventricular zone.

**(B)** Cumulative graph of the percentages of spontaneous seizures elicited in the mTOR-p.C1483Y (p.C1483Y) and p.L2427P (p.L2427P) FMCD mice (left) (mTOR-p.C1483Y: n = 24, mTOR-p.L2427P: n = 29).

**(C)** Representative neocortical electroencephalographic activity of epileptic seizures in FMCD adult mice (P56-P140).

Supplemental Figure 2

**A**

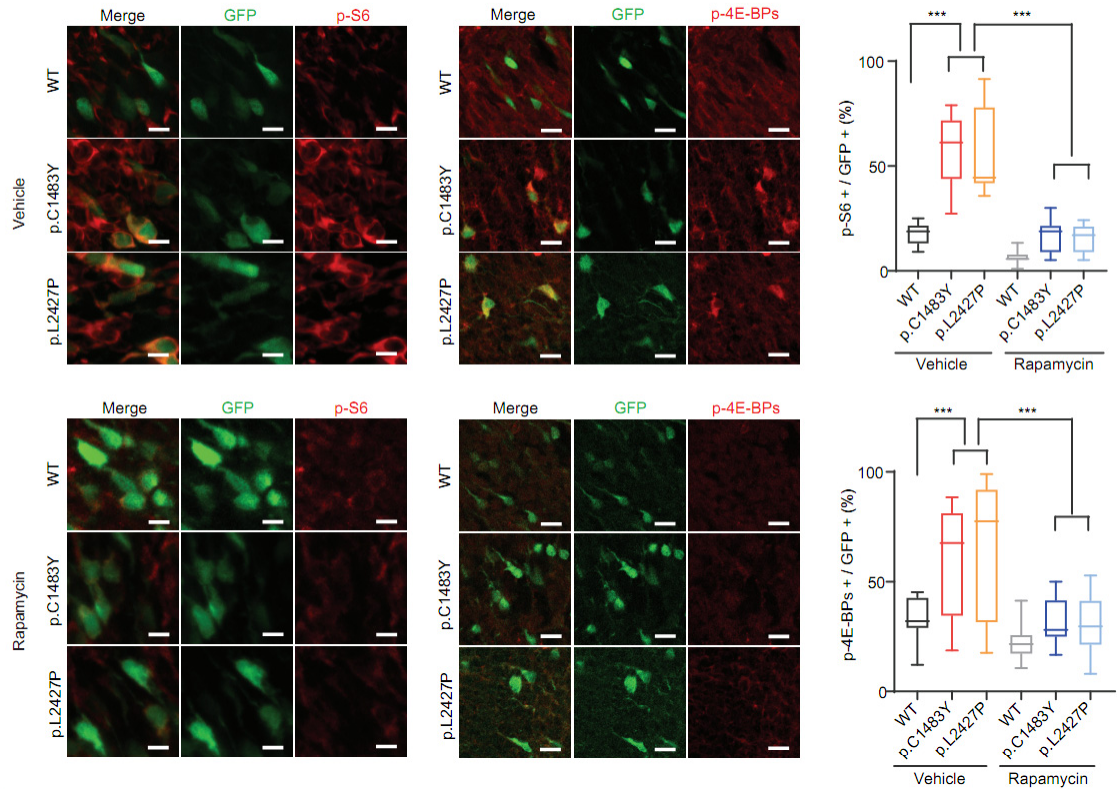

**B**

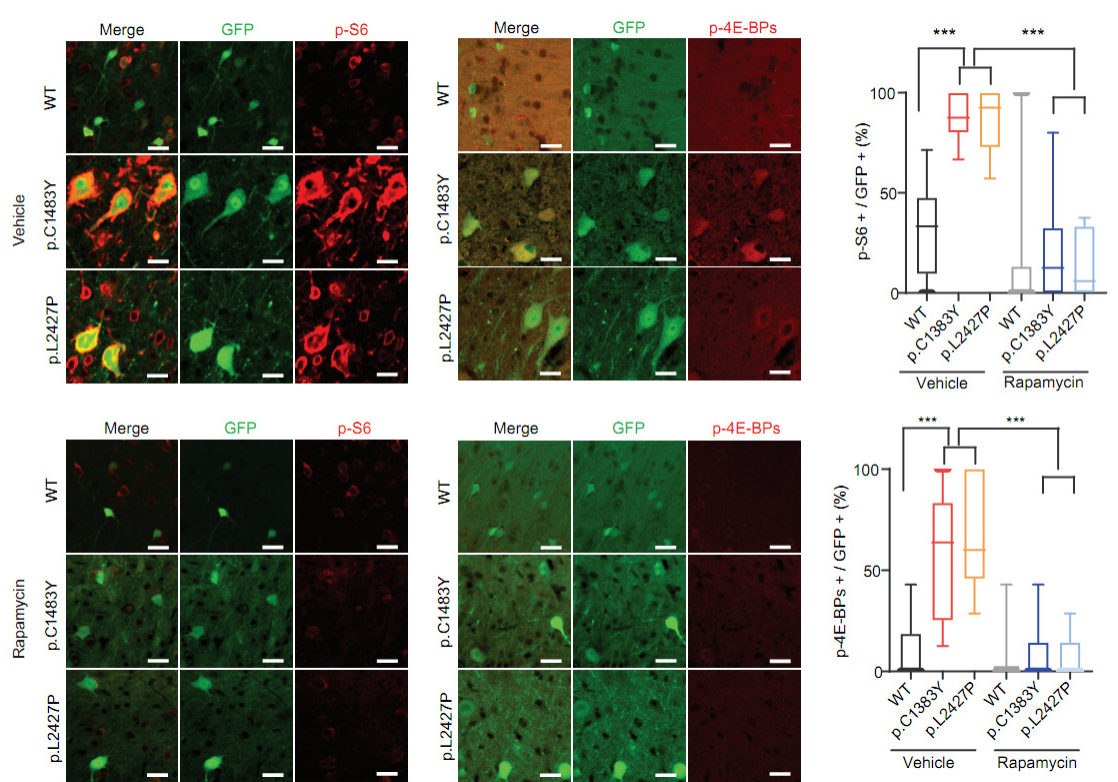

**Supplemental Figure 2. Aberrant activation of mTOR kinase reversed by mTOR inhibitor rapamycin in FMCD mice.**

**(A)** Representative immunofluorescence staining of p-S6 (Ser240/244) and p-4E-BPs (Thr37/46) in GFP-positive cells from vehicle-treated (top) and rapamycin-treated (bottom) FMCD mice at E18. GFP expressing cells positive for each marker were quantified in the average of two to five representative cortical regions. \*\*\*  $P < 0.001$  (WT-vehicle:  $n = 9$ , p.C1483Y-vehicle:  $n = 9$ , p.L2427P-vehicle:  $n = 11$ , WT-rapamycin:  $n = 8$ , p.C1483Y-rapamycin:  $n = 9$ , p.L2427P-rapamycin:  $n = 5$ , one-way ANOVA with Bonferroni post-hoc test). For p-S6, scale bars = 10  $\mu\text{m}$  and for p-4E-BPs, scale bars = 25  $\mu\text{m}$ .

**(B)** Representative immunofluorescence staining of p-S6 (Ser240/244) and p-4E-BPs (Thr37/46) in GFP-positive cells from vehicle-treated (top) and rapamycin-treated (bottom) adult FMCD mice (P56-P140). GFP expressing cells positive for each marker were quantified in the average of two to five representative cortical regions. \*\*\*  $P < 0.001$  ( $n = 5$  in each group, one-way ANOVA with Bonferroni post-hoc test). Scale bars, 25  $\mu\text{m}$ .



Supplemental Figure 3

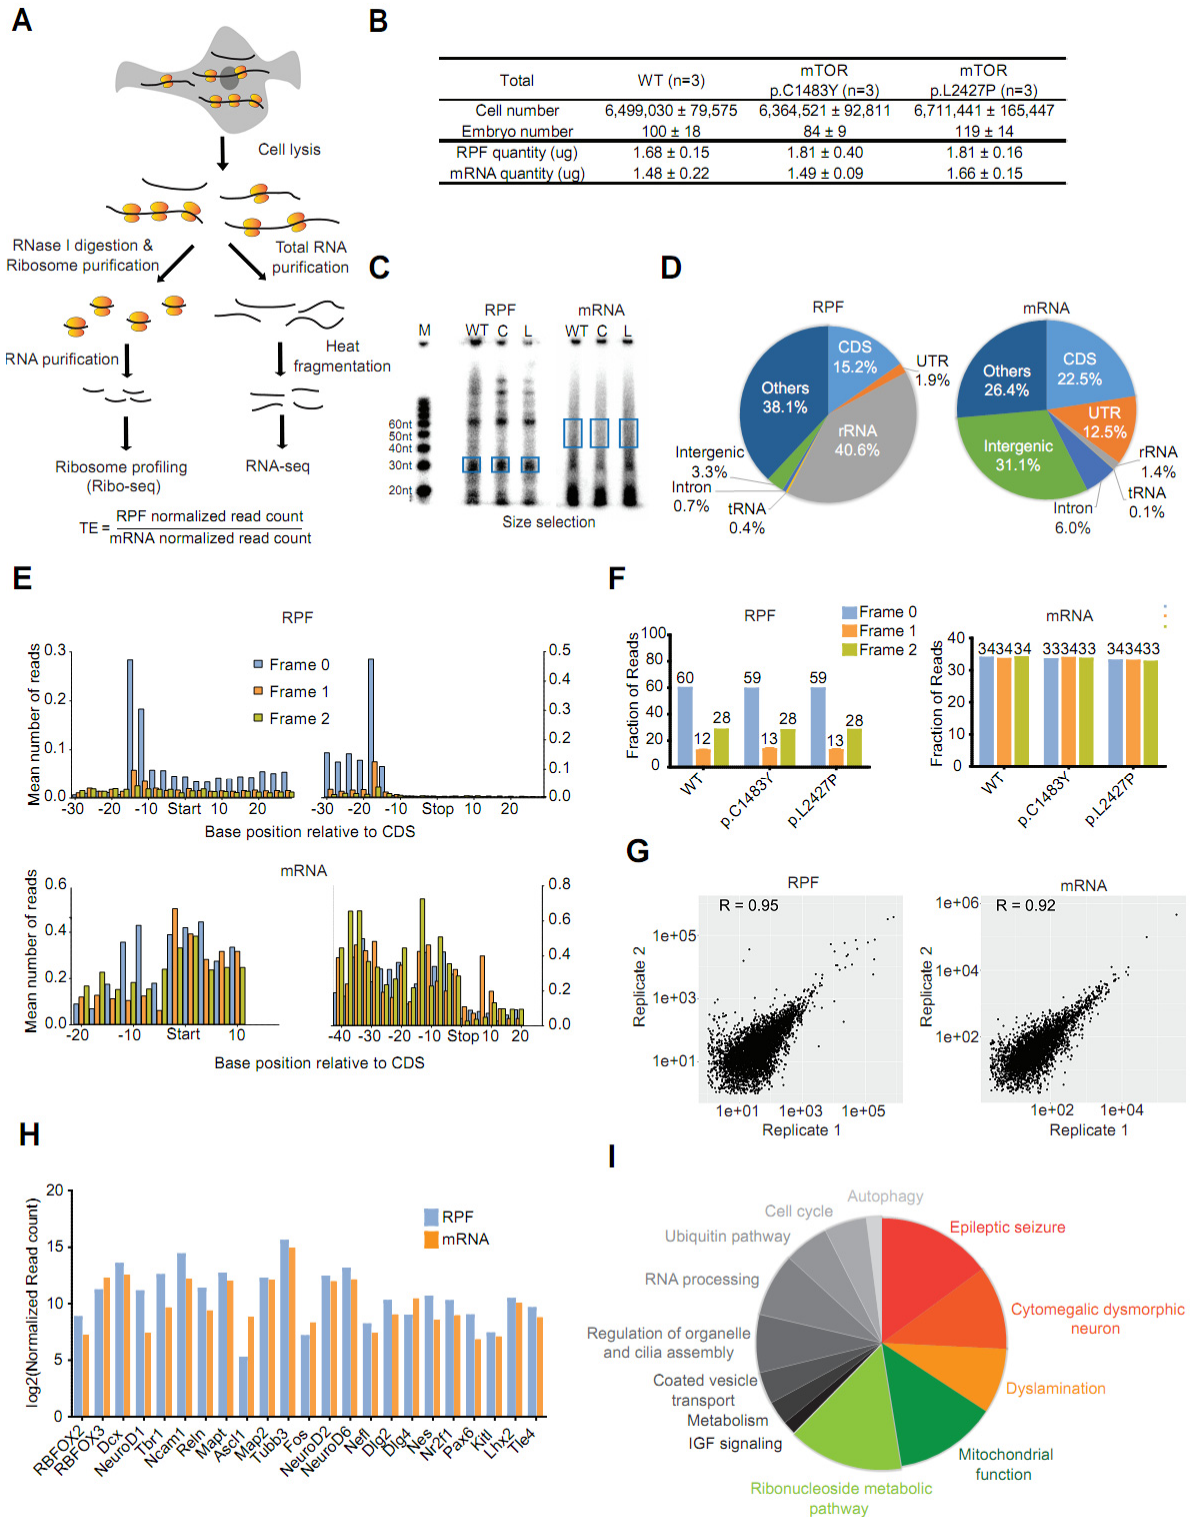

**Supplemental Figure 3. Validation of the quality of Ribo-seq and RNA-seq library preparation in WT, p.C1483Y, and p.L2427P mice.**

**(A)** Schematic diagram depicts the Ribo-seq and RNA-seq. TE was calculated by read count of RPF normalized by read count of mRNA of each mRNA.

**(B)** Cell number, embryo number, and amount of RPF and mRNA used for Ribo-seq and RNA-seq library preparation in FMCD mice.

**(C)** Representative images of library preparation of RPF and mRNA upon gel excision during the process of size selection. M: marker, WT: WT mice, C: p.C1483Y mice, L: p.L2427P mice.

**(D)** Mapping distributions of read counts for the assigned classes in the RPF (left) and mRNA (right) libraries.

**(E)** Density of RPF (top) and mRNA (bottom) reads near the translation start and stop codons.

**(F)** Fractions of RPF (top) and mRNA (bottom) reads mapped to each of the three nucleotides in the codons.

**(G)** Pearson's correlation of the RPF (left) and mRNA (right) libraries.

**(H)** The expression of neuronal markers in GFP-positive cells. Each of the neuronal markers are shown on the x-axis. The level of expression is presented as Log2(normalized read counts) on the y-axis. Blue bars represent RPFs of mTOR WT mice; orange bars represent mRNA of WT mice.

**(I)** Pie chart representing functional classification of mTOR activation-sensitive genes in FMCD mice.

Supplemental Figure 4

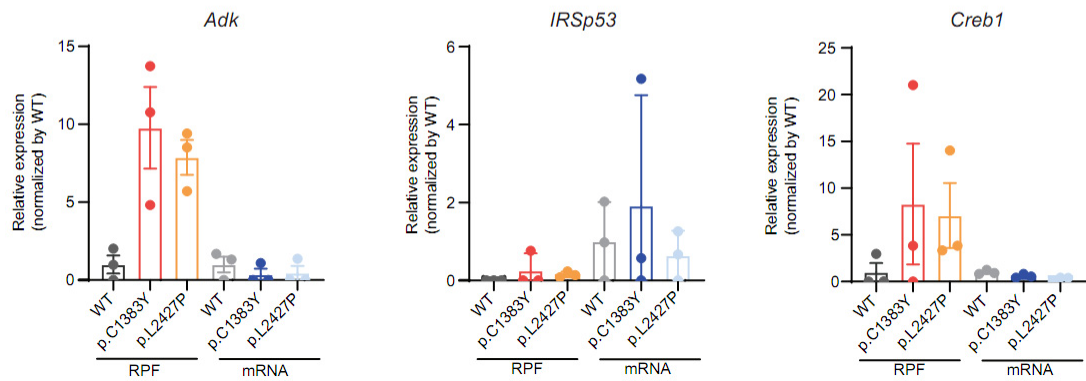

**Supplemental Figure 4. Translational activation of *Adk*, *IRSp53*, and *Creb1* in FMCD mice.**

Bar graphs showing the fold changes in RPF and mRNA of *Adk*, *IRSp53*, and *Creb1* in the WT, p.C1483Y, and p.L2427P mice (n = 3 in each group). Mean ± SD.

Supplemental Figure 5

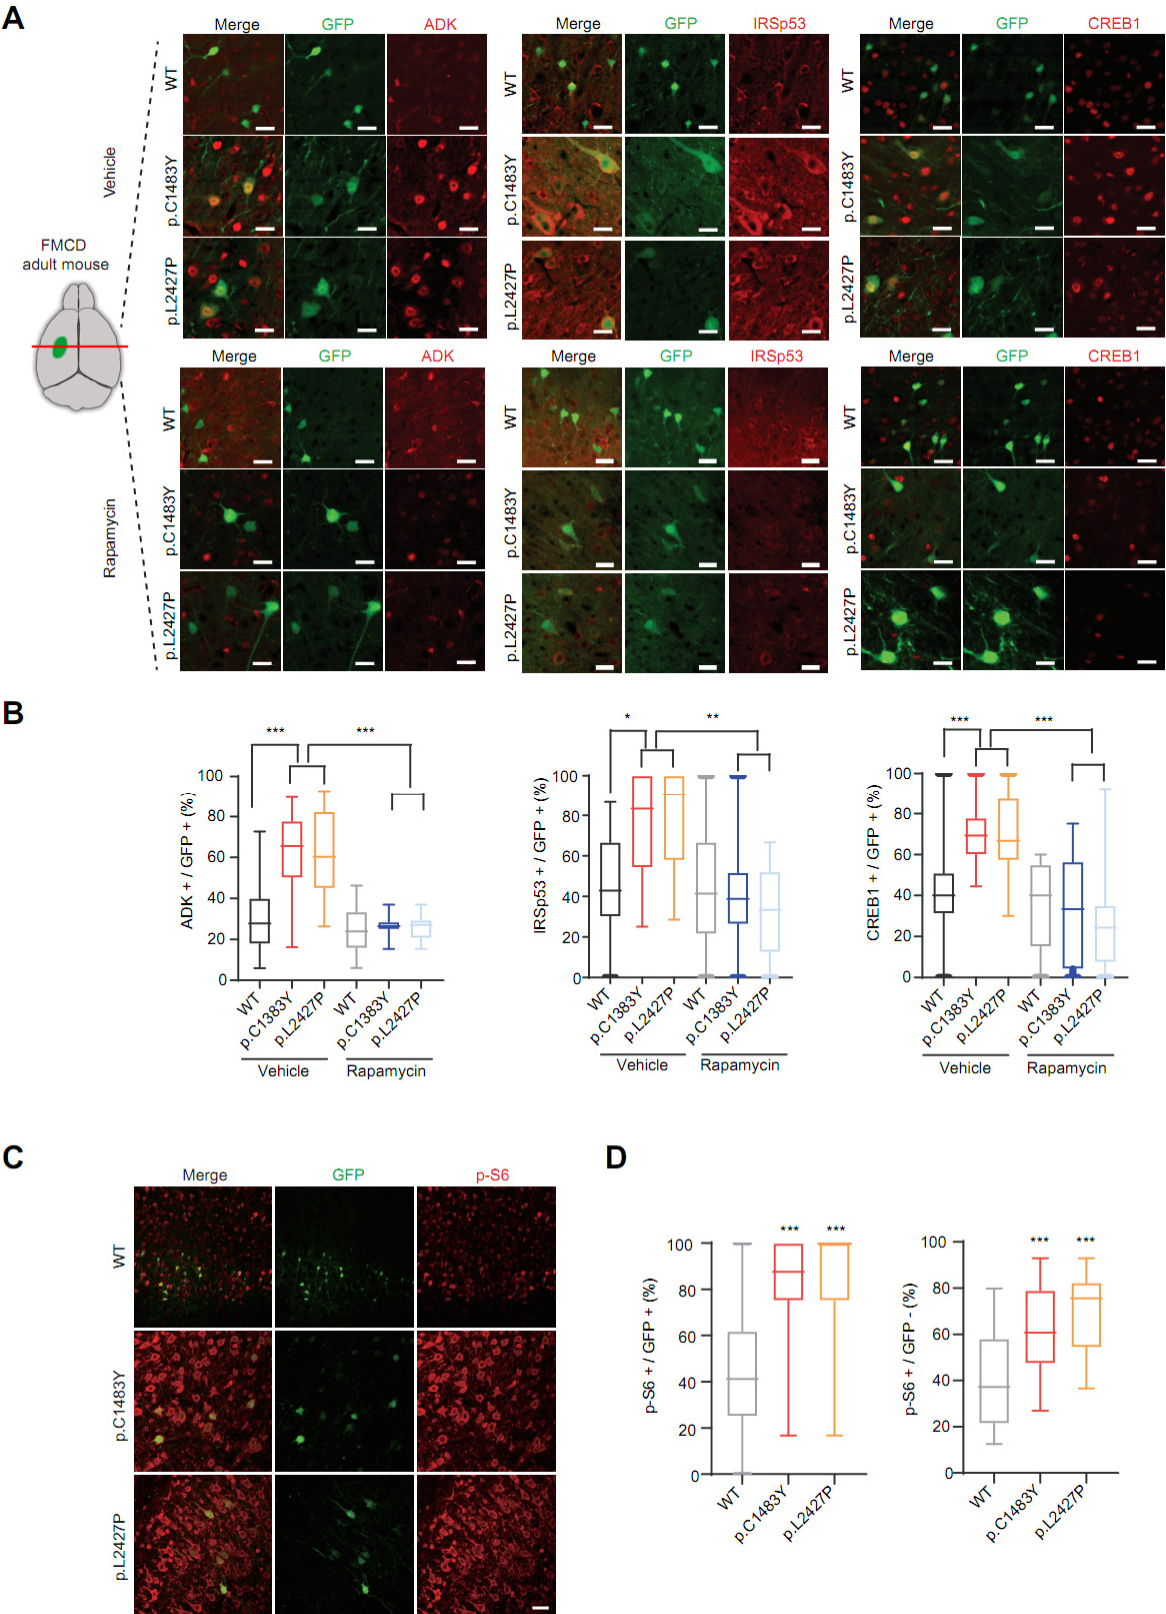

**Supplemental Figure 5. The increased expression of ADK, IRSp53, and CREB1 in mTOR activating mutation-carrying neurons is rescued by the treatment of rapamycin in FMCD adult mice.**

**(A)** Representative immunofluorescence staining of mTOR activation-sensitive genes (ADK, IRSp53, and CREB1 [red]) in GFP-positive cells (green) from FMCD adult (P56-P140) mice treated with vehicle (top) or rapamycin (bottom). Scale bars, 25  $\mu$ m.

**(B)** Quantification of samples in (A). ADK-, IRSp53-, or CREB1 (red)-positivity among GFP-positive cells in the average of two to five representative cortical regions of FMCD mice. \*  $P < 0.05$ , \*\*  $P < 0.01$ , and \*\*\*  $P < 0.001$  ( $n = 5$  in each group, one-way analysis of variance [ANOVA] with Bonferroni post-hoc test).

**(C)** Representative immunofluorescence staining of p-S6 (Ser240/244) (red) in FMCD mice (P21). Scale bar, 50  $\mu$ m.

**(D)** Quantification of samples in (C). p-S6 (Ser240/244) (red)-positivity among GFP-positive or GFP-negative cells in the average of two to five representative cortical regions of FMCD mice \*\*\*  $P < 0.001$  (relative to WT,  $n = 3$  in each group, one-way ANOVA with Bonferroni post-hoc test).



## Supplemental Figure 6

**A**

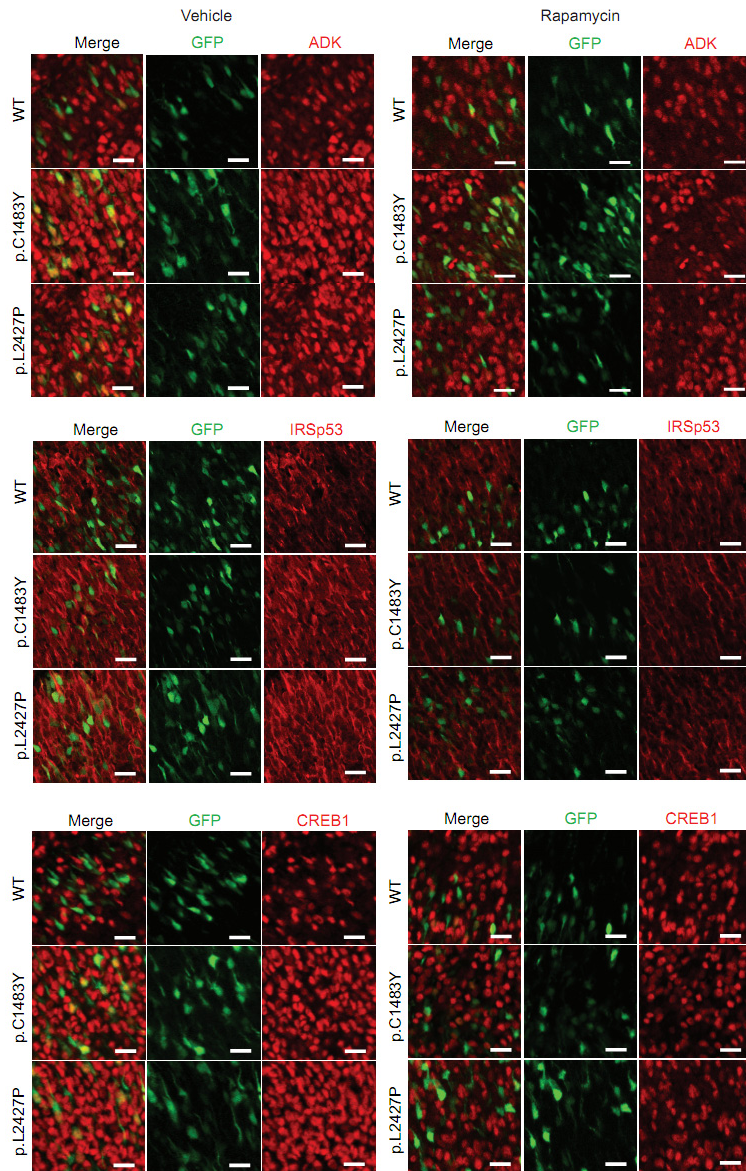

**B**

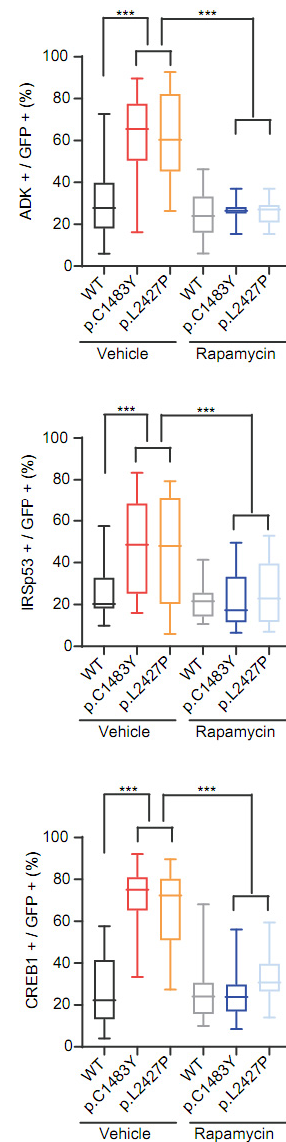

**Supplemental Figure 6. The increased expression of ADK, IRSp53, and CREB1 in mTOR activating mutation-carrying neurons is rescued by the treatment of rapamycin in FMCD mice at E18.**

**(A)** Representative immunofluorescence staining of mTOR activation-sensitive genes (ADK, IRSp53, and CREB1 [red]) in GFP-positive cells from E18 mice expressing mTOR p.C1483Y



(p.C1483Y) or p.L2427P (p.L2427P) treated with vehicle (left) and rapamycin (right). Scale bars, 25  $\mu$ m.

**(B)** Quantification of **(A)**. ADK-, IRSp53-, or CREB1 (red)-positivity among GFP-positive cells in the average of two to five representative cortical regions of FMCD mice. \*\*\*  $P < 0.001$  ( $n = 5$  in each group, one-way analysis of variance with Bonferroni post-hoc test).

Supplemental Figure 7

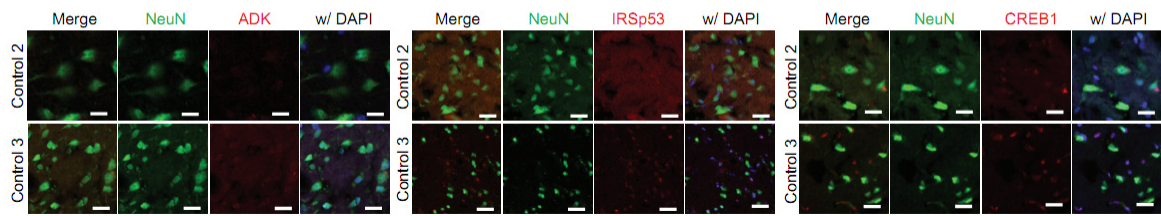

**Supplemental Figure 7. The expression of ADK, IRSp53, and CREB1 in brain tissues from control brain tissues.** Representative immunofluorescence staining of translationally up-regulated mTOR targets (ADK, IRSp53, and CREB1 [red]) in NeuN+ (green) cells from the patient's brain tissues stained with DAPI (blue). Scale bars, 25 um for ADK and CREB1, 60 um for IRSp53. Control 2 refers to the postmortem brain tissues of UMB5408 and Control 3 refers to the unaffected brain region of FCD247.

Supplemental Figure 8

A

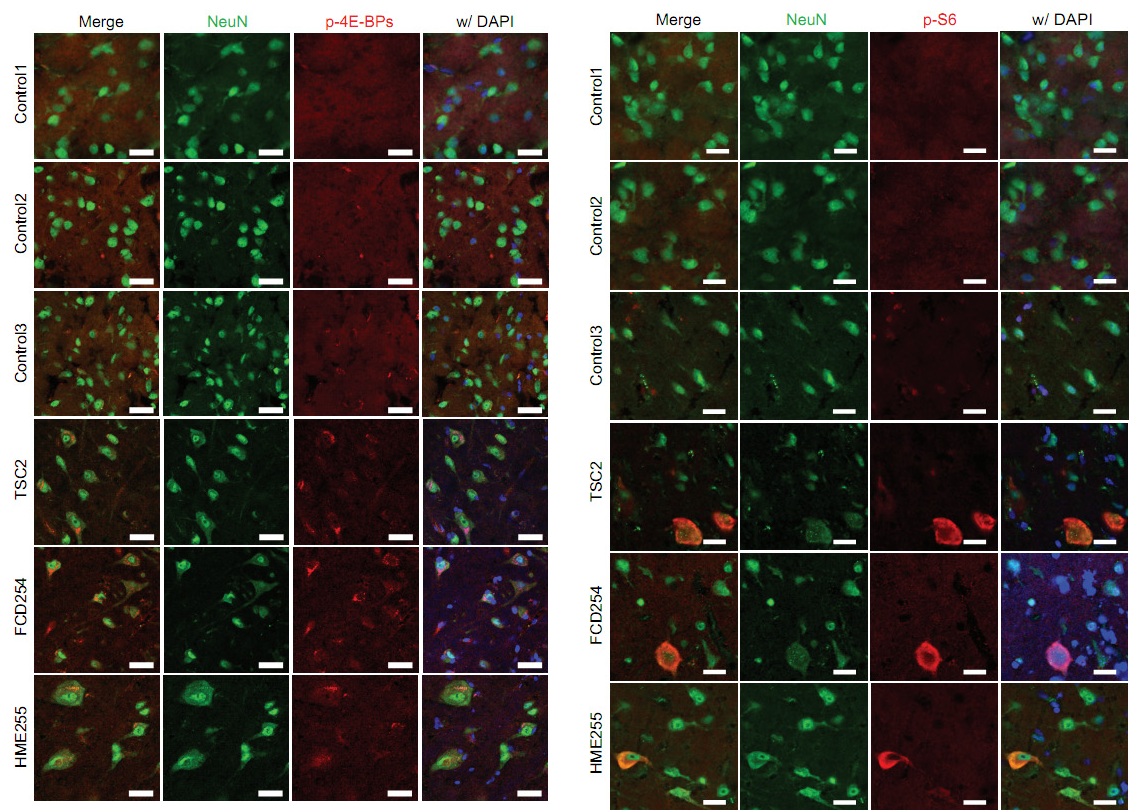

B

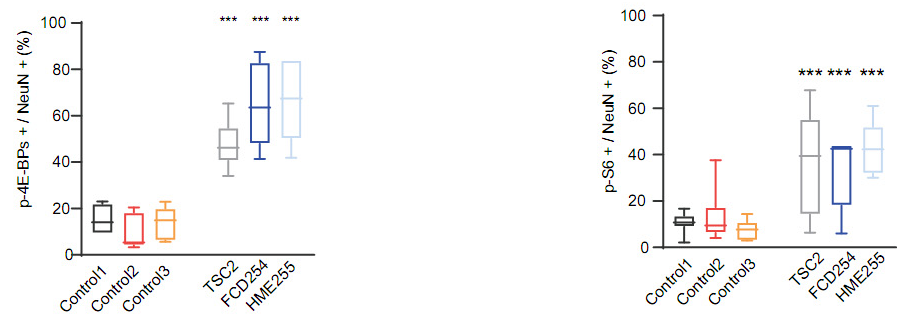

Supplemental Figure 8. The aberrant activation of mTOR kinase in cortical neurons from FMCD patients.

(A) Representative immunofluorescence staining of mTOR downstream targets p-4E-BPs (Thr37/46, left) and p-S6 (Ser240/244, right) (red) in NeuN<sup>+</sup> (green) cells from FMCD patients. Scale bars, 25  $\mu$ m. Control 1 refers to the postmortem brain tissues of UMB5309, control 2 refers to the postmortem brain tissues of UMB5408, and control 3 refers to the unaffected brain region of FCD247.

(B) Quantification of (A). Representative cortical regions in each FMCD patient were averaged. \*  $P < 0.05$ , \*\*  $P < 0.01$ , and \*\*\*  $P < 0.001$  (one-way analysis of variance with Bonferroni post-hoc test).

## Supplemental Figure 9

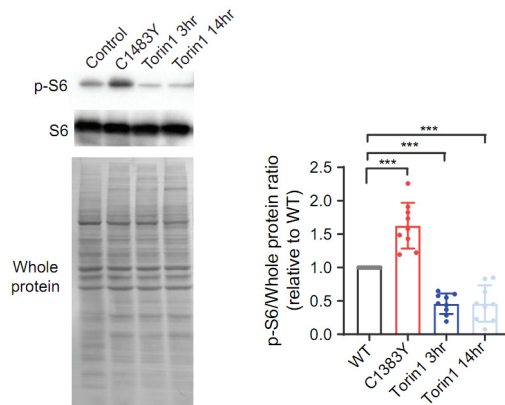

**Supplemental Figure 9. The activation and inhibition of mTOR kinase in C1483Y cells and in Torin1 cells.** Western blot analysis of p-S6 (Ser240/244), a major read-out of mTOR activation, in C1483Y cells (C1483Y). NIH3T3 cells treated with 200 nM Torin1 for 3 hr (Torin1 3hr) and NIH3T3 cells treated with 200 nM Torin1 for 14 hr (Torin1 14hr). EZblue staining in whole protein lysates were used as loading controls. p-S6 levels are presented as relative ratios to that in control cell lines. \*\*\*  $P < 0.001$  ( $n = 9$  in each group, one-way analysis of variance with Bonferroni post-hoc test). Mean  $\pm$  SD.

Supplemental Figure 10

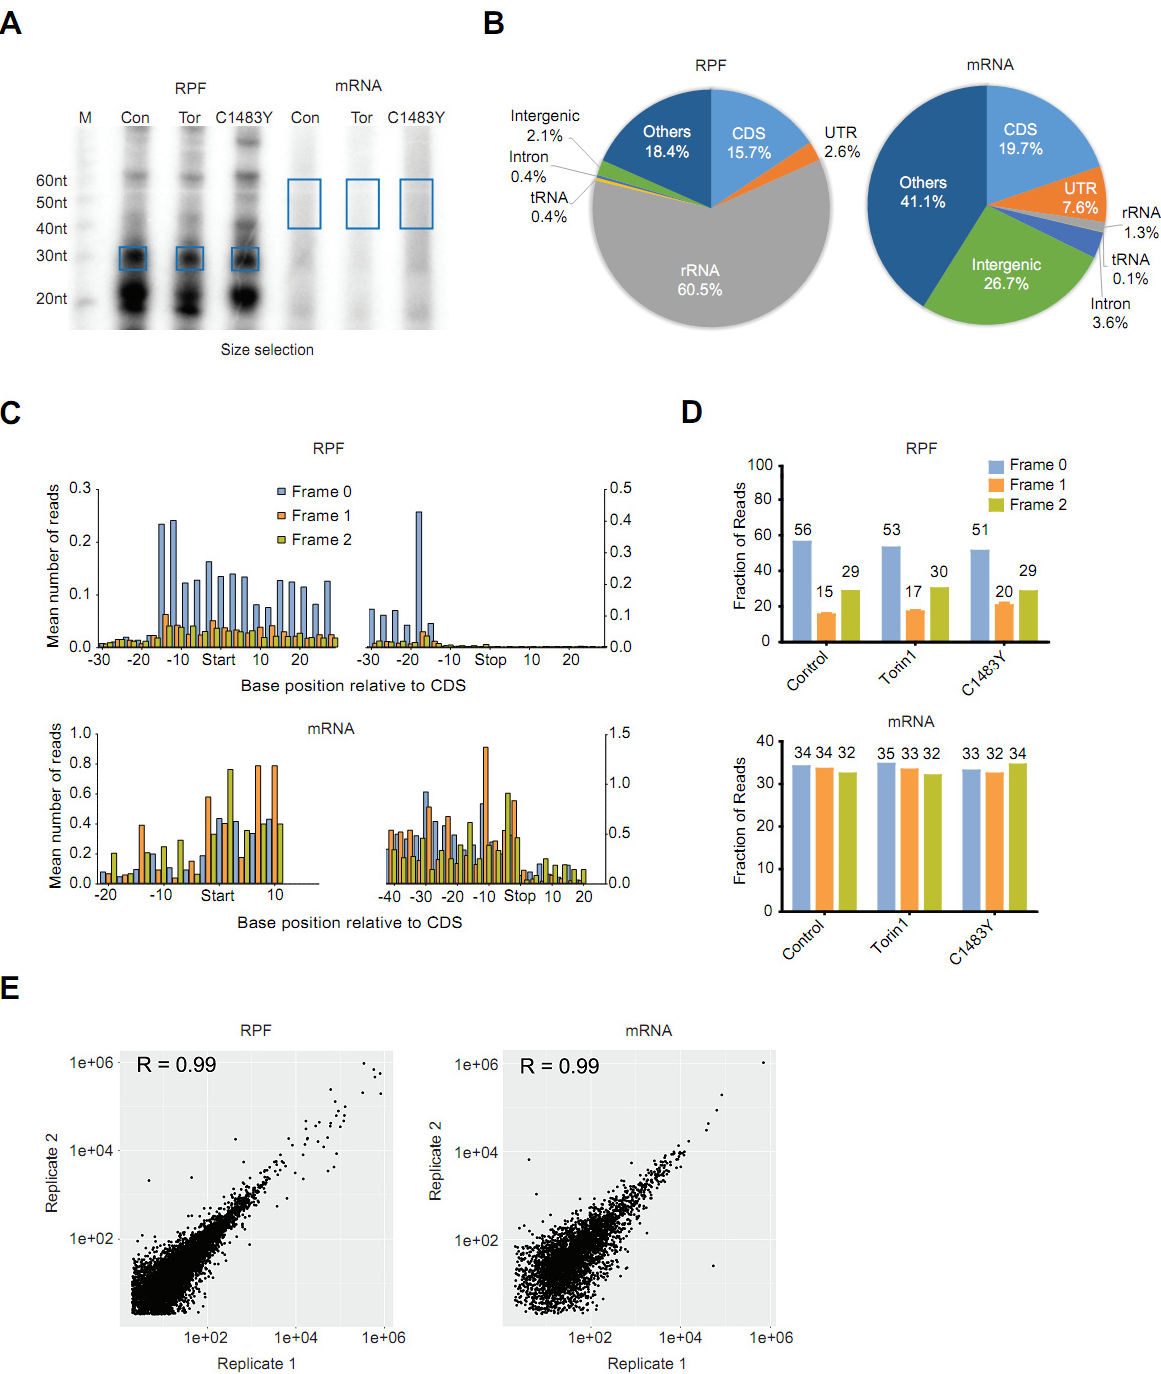

Supplemental Figure 10. Validation of the quality of Ribo-seq and RNA-seq library preparation.



(A) Representative images of library preparation of Ribo-seq and RNA-seq upon gel excision during size selection. M: marker, Con: vehicle-treated NIH3T3 WT cells, C1483Y: C1483Y cells, Tor: Torin1 3-hr treated NIH3T3 WT cells.

(B) Mapping distributions of read counts for the assigned classes in the RPF (left) and mRNA (right) reads. CDS: coding sequence, UTR: untranslated region.

(C) Density of RPF (top) and mRNA (bottom) reads near the translation start and stop codons.

(D) Fractions of RPF (top) and mRNA (bottom) reads mapped to each of the three nucleotides in the codons. Three-nucleotide periodicity reflects the movement of ribosomes along mRNA by three nucleotides at a time. Control: control cells, Torin1: Torin1 cells, C1483Y: C1483Y cells.

(E) Pearson's correlation of the RPF (left) and mRNA (right) library replicates.

Supplemental Figure 11

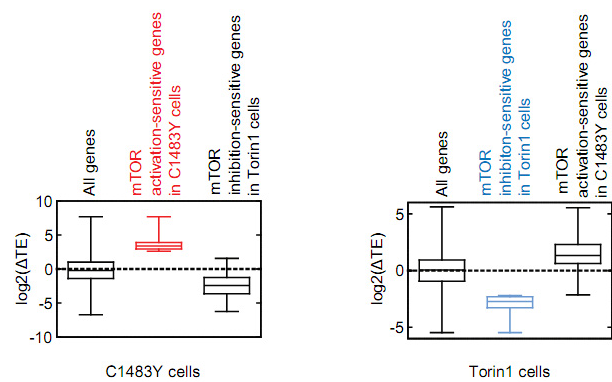

**Supplemental Figure 11. Translational profile of mTOR activation-sensitive genes is distinct from that of mTOR inhibition-sensitive genes.** Box plots showing the log2 ratios of fold changes ( $\log_2[\Delta TE]$ ) in the TEs of mRNAs encoding all genes, mTOR inhibition-sensitive genes in Torin1 cells from C1483Y cells (left) and mTOR activation-sensitive genes in C1483Y cells from Torin1 cells (right) relative to control cells.

Supplemental Figure 12

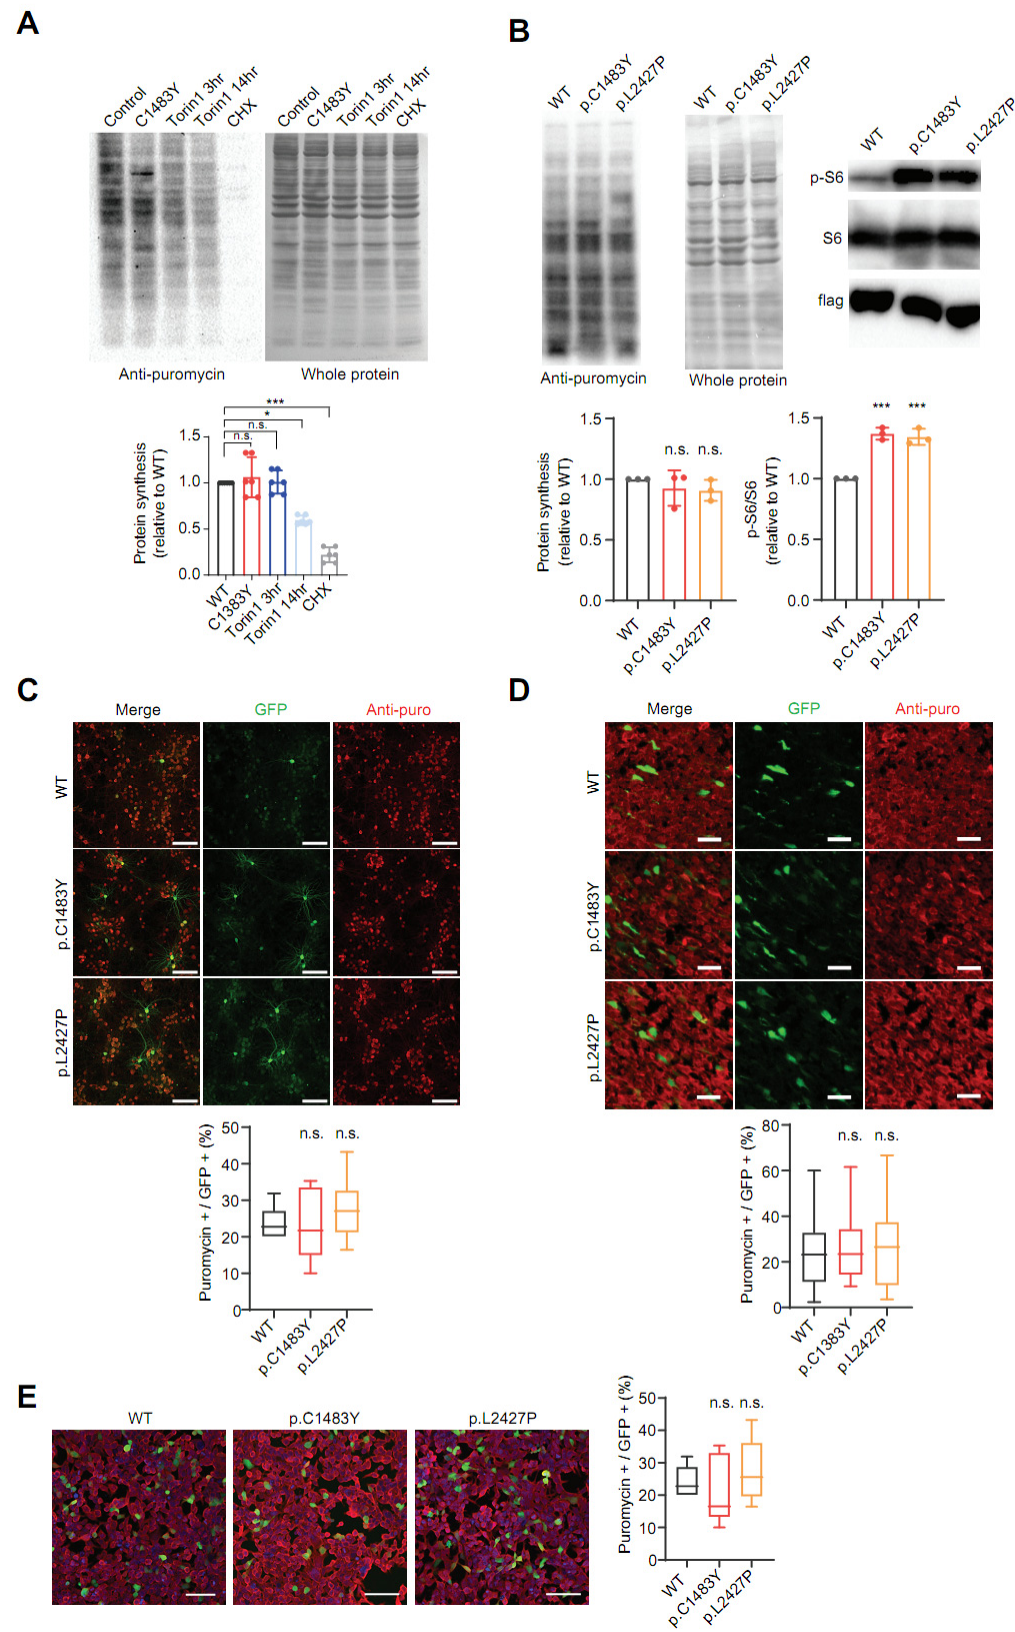

**Supplemental Figure 12. Protein synthesis rates are not significantly affected by human *MTOR* mutations *in vitro* and *in vivo*.**

**(A)** Western blot and quantification of protein lysates from control cells (Control), C1483Y cells (C1483Y), and Torin1 treated cells (Torin1 3 hr and Torin1 14 hr, 200 nM) to measure basal rates of protein synthesis. EZblue staining in whole protein lysates was used as a loading control.  $n = 6$  in each group. Mean  $\pm$  SD.

**(B)** Western blot and quantification of protein lysates from flag-mTOR WT (WT), flag-mTOR p.C1483Y (p.C1483Y), or flag-mTOR p.L2427P (p.L2427P) overexpressing HEK293T cells to measure basal rates of protein synthesis. EZblue staining in whole protein lysates was used as a loading control.  $n = 3$  in each group. Mean  $\pm$  SD.

**(C)** Representative immunofluorescence staining of puromycin incorporated proteins in primary cultured cortical neurons expressing mTOR WT (WT), mTOR p.C1483Y (p.C1483Y), or mTOR p.L2427P (p.L2427P) with GFP-reporter. The level of puromycin incorporation is presented as puromycin positivity in GFP-positive cells.  $n = 3$  in each group. Scale bars, 100  $\mu$ m.

**(D)** Representative immunofluorescence staining of puromycin incorporated proteins in the cortices of E18 mouse embryos expressing mTOR WT (WT), mTOR p.C1483Y (p.C1483Y), or mTOR p.L2427P (p.L2427P) mice with GFP reporter. Puromycin incorporation is presented as puromycin positivity in GFP-positive cells.  $n = 5$  in each group. Scale bars, 30  $\mu$ m.

**(E)** Representative immunofluorescence staining of puromycin incorporated proteins in HEK293T cells expressing mTOR WT (WT), mTOR p.C1483Y (p.C1483Y), or mTOR p.L2427P (p.L2427P) with GFP reporter. The level of puromycin incorporation is presented as puromycin positivity in GFP-positive cells.  $n = 3$  in each group. Scale bars, 200  $\mu$ m.

\*  $P < 0.05$  and \*\*\*  $P < 0.001$ , one-way ANOVA with Bonferroni post-hoc test

Supplemental Figure 13

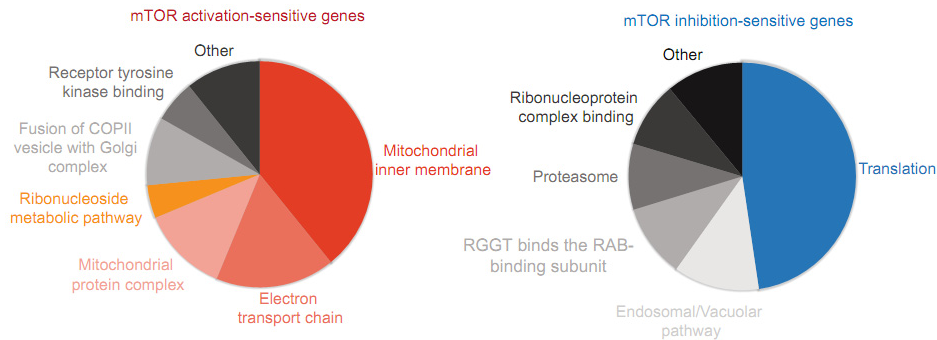

**Supplemental Figure 13. Enriched functional clusters of mTOR activation-sensitive genes is distinct from that of mTOR inhibition-sensitive genes.** Pie charts represent cluster analysis results of mTOR activation-sensitive genes in C1483Y cells (135 genes with z-score  $\geq 1.5$ , top) and mTOR inhibition-sensitive genes in Torin1 cells (144 genes with z-score  $\leq -1.5$ , Torin1 down-regulated, bottom). Each functional cluster is significantly enriched in GO terms generated by the ClueGo app in Cytoscape. The size of the pie corresponds to the number of genes.

Supplemental Figure 14

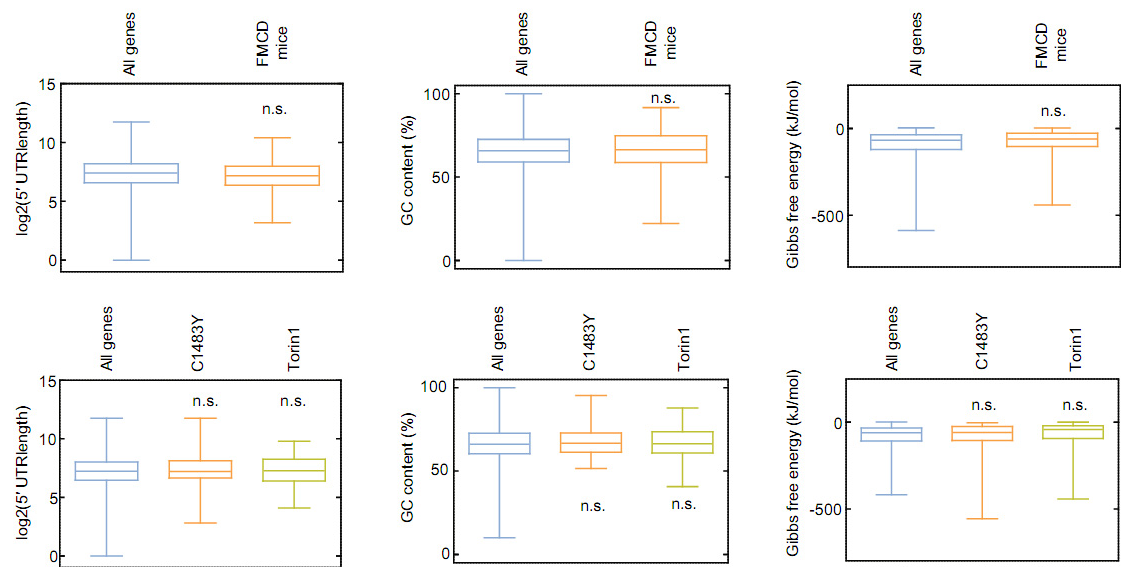

**Supplemental Figure 14. Canonical 5' UTR features of mTOR activation- and inhibition-sensitive genes.** Comparison of canonical 5' UTR features between all genes and subsets whose TEs were related with mTOR activation-sensitive genes in the FMCD mice and C1483Y cells (C1483Y) or with mTOR inhibition-sensitive genes in Torin1 cells (Torin1).



Supplemental Figure 15

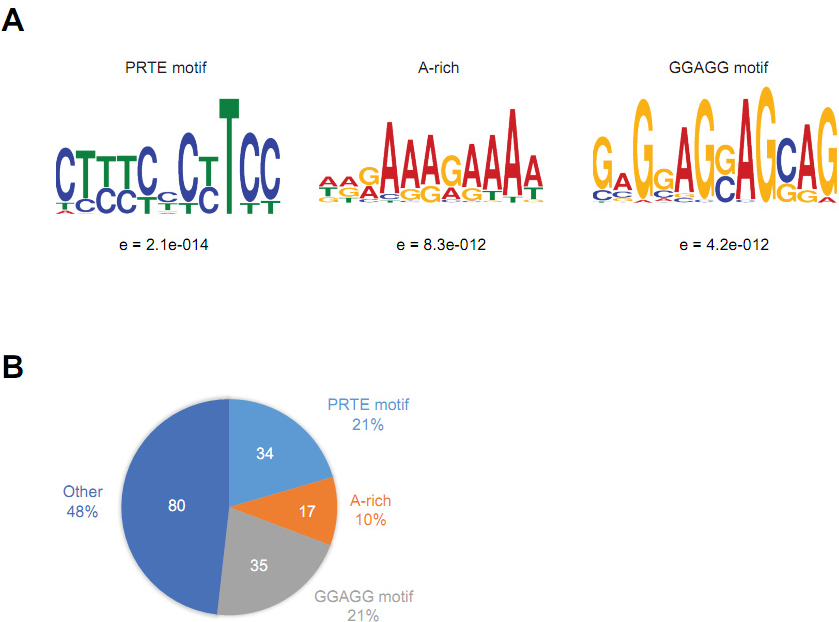

**Supplemental Figure 15. 5' UTR motifs of mTOR inhibition-sensitive genes found in Torin1 cells.**

**(A)** MEME analysis showing consensus sequences and enrichment values (E-value) of the pyrimidine-rich translational element (PRTE), A-rich, and GGAGG motifs of mTOR inhibition-sensitive genes found in Torin1 cells.

**(B)** Diagram illustrating the percentage and number of mTOR inhibition-sensitive genes containing a PRTE, A-rich, or GGAGG motifs.

Supplemental Figure 16

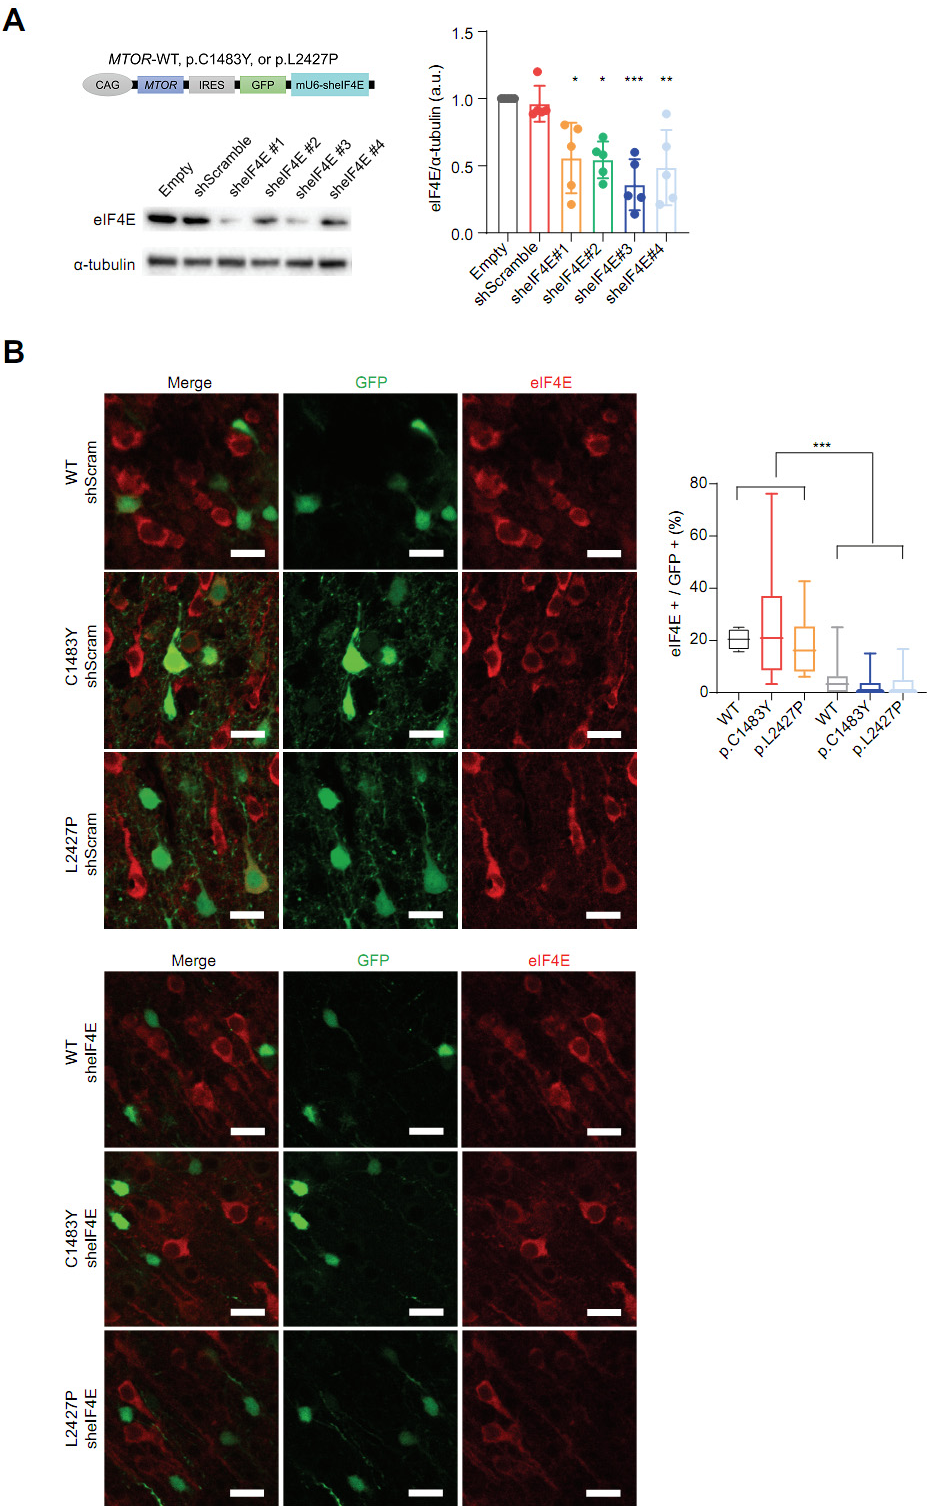

324

325 Supplemental Figure 16. The efficient knockdown of eIF4E in FMCD mice.

Page 24

(A) Western blot analysis of eIF4E in shEIF4E RNAs expressing Neuro2A cells. shEIF4E#2 was used for further analysis. Quantification of Western blots relative to empty vector, \*  $P < 0.05$ , \*\*  $P < 0.01$ , and \*\*\*  $P < 0.001$  ( $n = 5$  in each case, one-way ANOVA with Bonferroni post-hoc test). Mean  $\pm$  SD.

(B) Representative images of eIF4E (red) knockdown in GFP-positive cells from P7 FMCD mice electroporated with shScramble (top) or shEIF4E (bottom) RNA expressing vectors. \*\*\*  $P < 0.001$  ( $n = 5$  in each case, one-way ANOVA with Bonferroni post-hoc test). Scale bar = 20  $\mu\text{m}$ . Mean  $\pm$  SEM.

Supplemental Figure 17

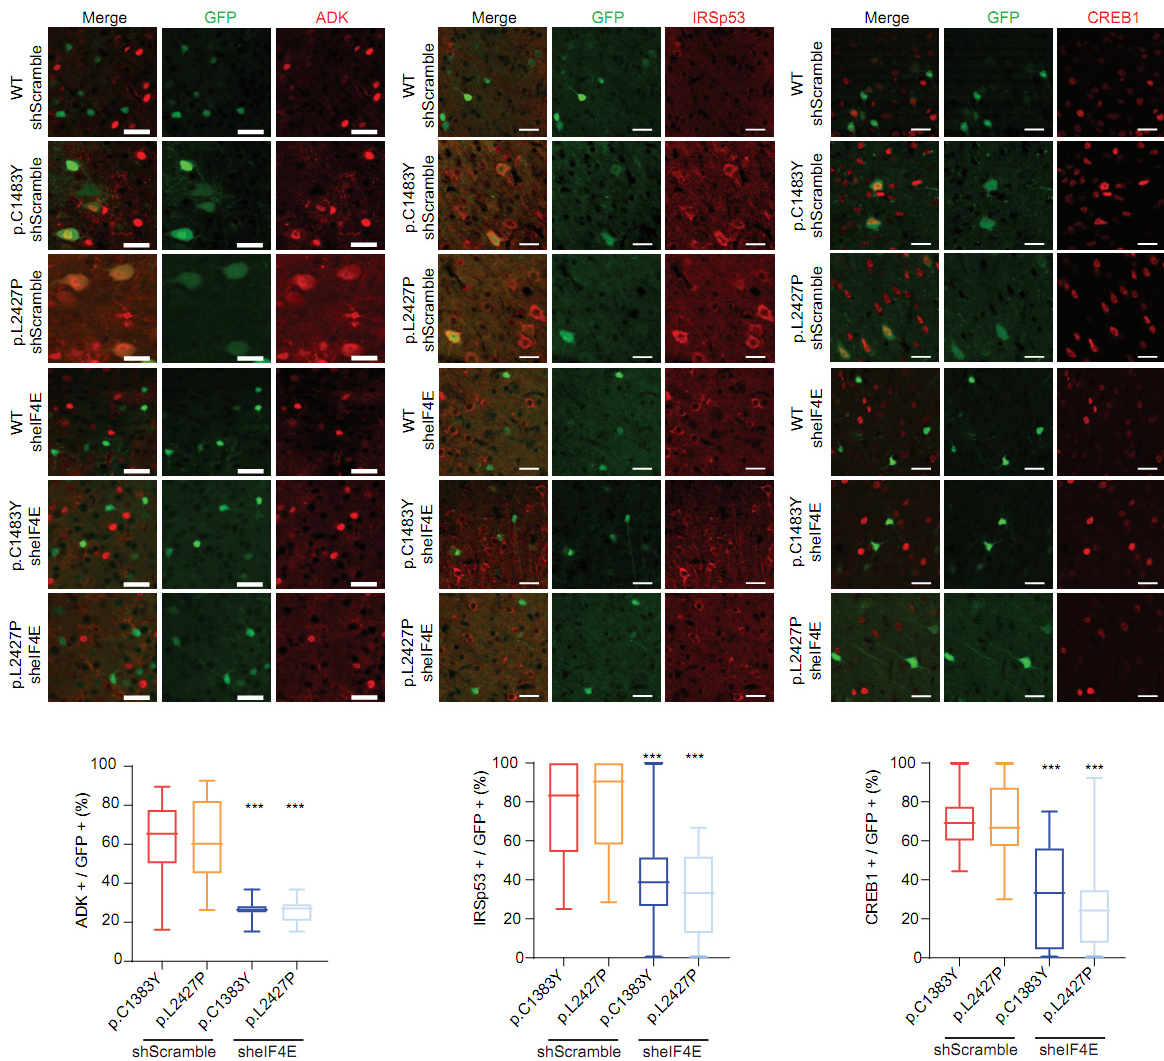

**Supplemental Figure 17. The increased expression of ADK, IRSp53, and CREB1 in mTOR activating mutation-carrying neurons is rescued by the knockdown of eIF4E.** Representative images of ADK, IRSp53, and CREB1 (red) in GFP-positive cells from P21 FMCD mice treated with shScramble (top) or shelF4E (bottom). \*\*\*  $P < 0.001$  (n = 5 in each case, one-way analysis of variance [ANOVA] with Bonferroni post-hoc test). Scale bar = 25  $\mu$ m.

Supplemental Figure 18

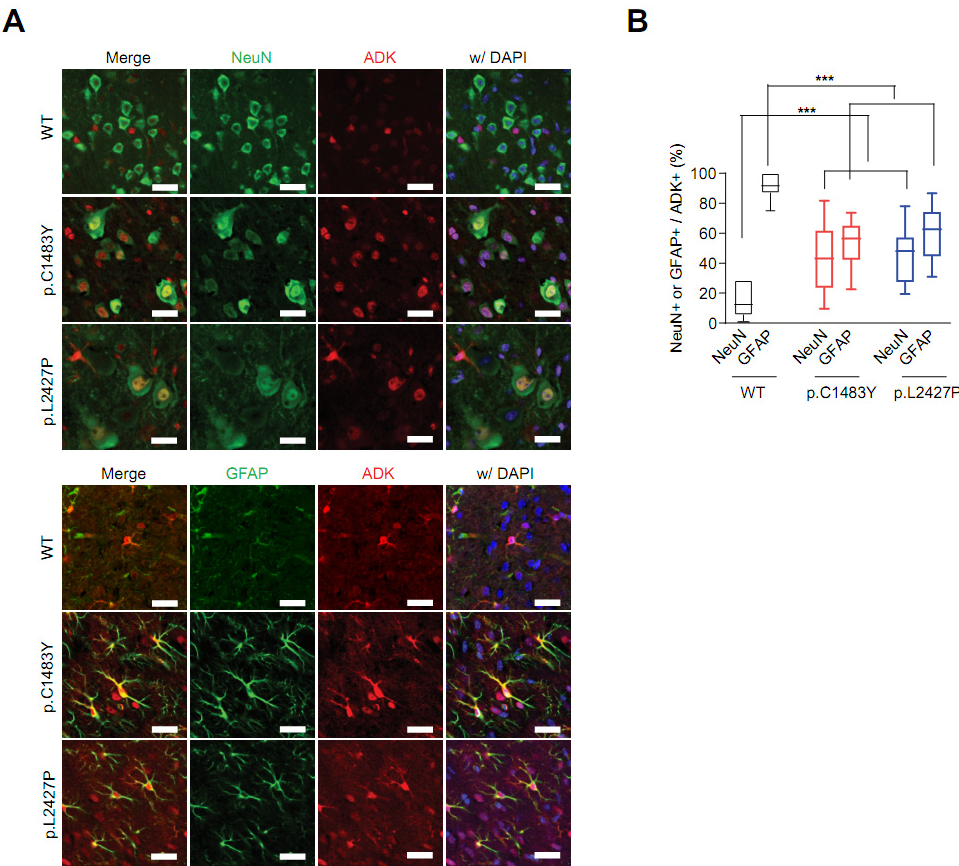

**Supplemental Figure 18. ADK expression in cortical neurons and astrocytes from FMCD mice brains.**

**(A)** Representative images of NeuN (green, top) or GFAP (green, bottom) and ADK (red) in GFP-positive cells from adult FMCD model mice (P56-P140).

**(B)** Quantification of (A). \*\*\*  $P < 0.001$  ( $n = 5$  in each case, one-way analysis of variance with Bonferroni post-hoc test). Scale bar = 25  $\mu\text{m}$ .



Supplemental Figure 19

A

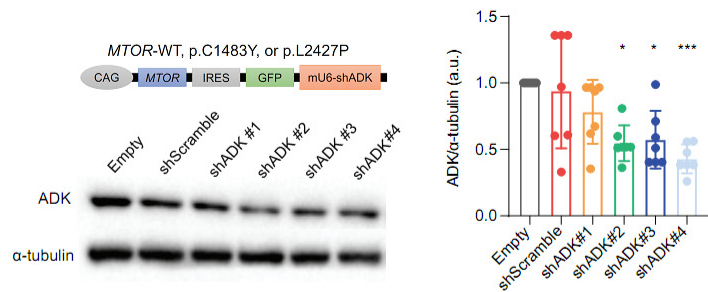

B

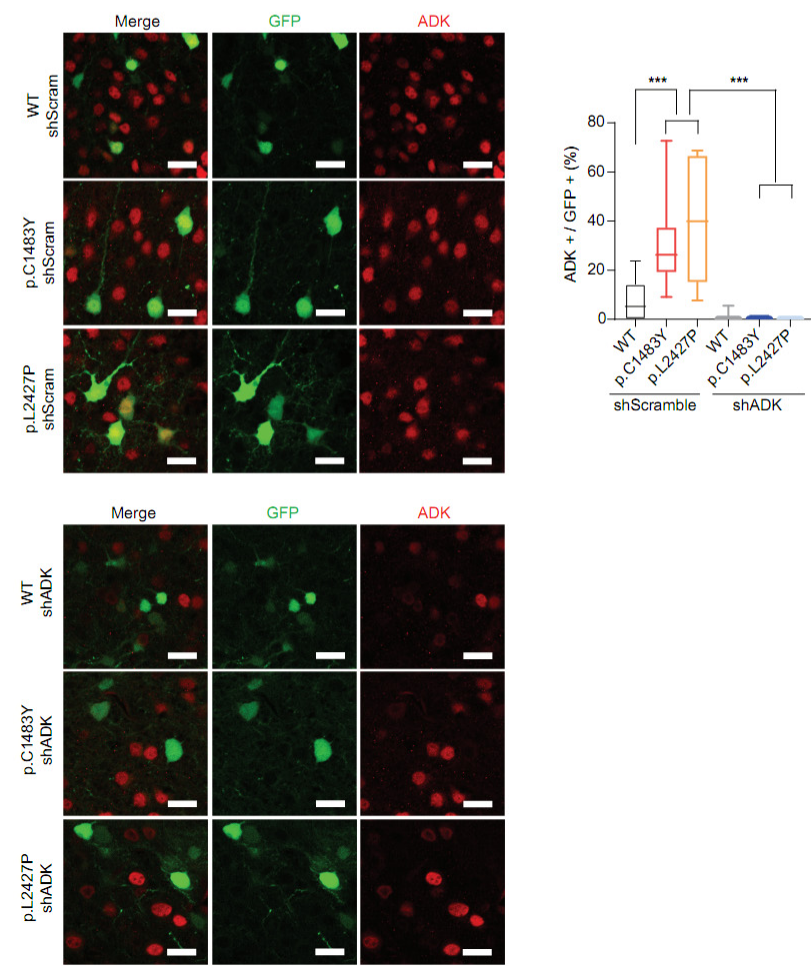

366

367 Supplemental Figure 19. The efficient knockdown of ADK in FMCD mice.



(A) Western blot analysis to show the efficiency of ADK knockdown in N2A cells. shADK #3 was used for further analysis. Quantification of western blot analysis with the loading control  $\alpha$ -tubulin relative to empty vector, \*  $P < 0.05$  and \*\*\*  $P < 0.001$  ( $n = 7$  in each case, one-way ANOVA with Bonferroni post-hoc test). Mean  $\pm$  SD.

(B) Representative images of ADK (red) knockdown in GFP-positive cells from P7 FMCD mice electroporated with shScramble (top) or shADK (bottom) RNA expressing vectors. Quantification of ADK knockdown. \*\*\*  $P < 0.001$  ( $n = 5$  in each case, one-way ANOVA with Bonferroni post-hoc test). Scale bar = 20  $\mu$ m.

391 Supplemental Table 1.

392 Mapping distributions of read counts for the assigned classes in the Ribo-seq and RNA-seq libraries of mTOR WT, mTOR p.C1483Y,  
393 and mTOR p.L2427P mice.

| Class                                      | RPF<br>WT 1st replicate | RPF<br>WT 2nd replicate | RPF<br>WT 3rd replicate | RPF<br>p.C1483Y 1st<br>replicate | RPF<br>p.C1483Y 2nd<br>replicate | RPF<br>p.C1483Y 3rd<br>replicate | RPF<br>p.L2427P 1st replicate | RPF<br>p.L2427P 2nd replicate | RPF<br>p.L2427P 3rd replicate | RNA-seq<br>WT 1st replicate | RNA-seq<br>WT 2nd replicate | RNA-seq<br>WT 3rd replicate | RNA-seq<br>p.C1483Y 1st<br>replicate | RNA-seq<br>p.C1483Y 2nd<br>replicate | RNA-seq<br>p.C1483Y 3rd<br>replicate | RNA-seq<br>p.L2427P 1st<br>replicate | RNA-seq<br>p.L2427P 2nd<br>replicate | RNA-seq<br>p.L2427P 3rd<br>replicate |
|--------------------------------------------|-------------------------|-------------------------|-------------------------|----------------------------------|----------------------------------|----------------------------------|-------------------------------|-------------------------------|-------------------------------|-----------------------------|-----------------------------|-----------------------------|--------------------------------------|--------------------------------------|--------------------------------------|--------------------------------------|--------------------------------------|--------------------------------------|
| CDS                                        | 8.27%                   | 11.18%                  | 25.40%                  | 9.08%                            | 9.24%                            | 19.40%                           | 15.69%                        | 12.02%                        | 26.71%                        | 29.21%                      | 23.20%                      | 20.03%                      | 30.04%                               | 24.40%                               | 20.99%                               | 26.98%                               | 14.83%                               | 13.02%                               |
| UTR                                        | 1.96%                   | 1.62%                   | 2.43%                   | 1.28%                            | 1.71%                            | 1.88%                            | 1.88%                         | 1.85%                         | 2.07%                         | 16.77%                      | 12.69%                      | 10.75%                      | 16.89%                               | 13.19%                               | 9.66%                                | 16.37%                               | 8.07%                                | 9.65%                                |
| rRNA                                       | 50.66%                  | 52.45%                  | 20.20%                  | 18.70%                           | 72.85%                           | 26.33%                           | 46.81%                        | 53.89%                        | 23.22%                        | 1.60%                       | 0.03%                       | 2.31%                       | 1.53%                                | 1.06%                                | 0.99%                                | 1.27%                                | 1.09%                                | 2.10%                                |
| tRNA                                       | 0.54%                   | 0.36%                   | 0.40%                   | 0.34%                            | 0.20%                            | 0.27%                            | 0.41%                         | 0.32%                         | 0.29%                         | 0.08%                       | 0.03%                       | 0.08%                       | 0.12%                                | 0.04%                                | 0.06%                                | 0.12%                                | 0.03%                                | 0.16%                                |
| Intron                                     | 0.51%                   | 0.39%                   | 0.85%                   | 1.69%                            | 0.45%                            | 0.55%                            | 0.49%                         | 0.47%                         | 0.85%                         | 5.85%                       | 5.91%                       | 10.69%                      | 5.38%                                | 4.99%                                | 3.69%                                | 6.45%                                | 3.75%                                | 6.91%                                |
| Intergenic                                 | 2.62%                   | 2.05%                   | 4.70%                   | 2.72%                            | 1.48%                            | 4.18%                            | 2.53%                         | 2.87%                         | 6.10%                         | 29.32%                      | 32.21%                      | 33.42%                      | 24.22%                               | 28.09%                               | 39.32%                               | 32.36%                               | 24.74%                               | 35.97%                               |
| Others                                     | 35.46%                  | 31.95%                  | 46.01%                  | 66.18%                           | 14.07%                           | 47.39%                           | 32.19%                        | 28.58%                        | 40.76%                        | 18.17%                      | 24.91%                      | 22.73%                      | 22.12%                               | 28.23%                               | 25.31%                               | 16.45%                               | 47.48%                               | 32.19%                               |
| Total Reads                                | 78538989                | 103941083               | 130980756               | 243382145                        | 105409798                        | 113437980                        | 81881324                      | 81623538                      | 88549718                      | 101252271                   | 141375625                   | 69676707                    | 114688454                            | 143206719                            | 92636343                             | 131307738                            | 88598443                             | 96911633                             |
| adaptor-only were removed from total count |                         |                         |                         |                                  |                                  |                                  |                               |                               |                               |                             |                             |                             |                                      |                                      |                                      |                                      |                                      |                                      |
| Read count                                 |                         |                         |                         |                                  |                                  |                                  |                               |                               |                               |                             |                             |                             |                                      |                                      |                                      |                                      |                                      |                                      |
| Class                                      | RPF<br>WT 1st replicate | RPF<br>WT 2nd replicate | RPF<br>WT 3rd replicate | RPF<br>p.C1483Y 1st<br>replicate | RPF<br>p.C1483Y 2nd<br>replicate | RPF<br>p.C1483Y 3rd<br>replicate | RPF<br>p.L2427P 1st replicate | RPF<br>p.L2427P 2nd replicate | RPF<br>p.L2427P 3rd replicate | RNA-seq<br>WT 1st replicate | RNA-seq<br>WT 2nd replicate | RNA-seq<br>WT 3rd replicate | RNA-seq<br>p.C1483Y 1st<br>replicate | RNA-seq<br>p.C1483Y 2nd<br>replicate | RNA-seq<br>p.C1483Y 3rd<br>replicate | RNA-seq<br>p.L2427P 1st<br>replicate | RNA-seq<br>p.L2427P 2nd<br>replicate | RNA-seq<br>p.L2427P 3rd<br>replicate |
| CDS                                        | 6,529,980               | 11,519,568              | 33,273,024              | 22,107,680                       | 9,736,770                        | 22,003,872                       | 12,847,657                    | 9,813,545                     | 23,650,200                    | 29,570,025                  | 32,798,533                  | 14,013,504                  | 34,268,460                           | 34,942,515                           | 19,441,832                           | 35,420,861                           | 12,831,722                           | 12,620,078                           |
| UTR                                        | 1,544,862               | 1,673,236               | 3,181,416               | 3,119,152                        | 1,802,929                        | 2,128,340                        | 1,541,260                     | 1,507,894                     | 1,836,659                     | 15,962,467                  | 17,939,142                  | 7,524,169                   | 18,911,114                           | 18,893,715                           | 8,944,379                            | 21,460,401                           | 6,980,943                            | 9,350,767                            |
| rRNA                                       | 39,487,803              | 54,043,696              | 26,462,136              | 45,503,549                       | 76,793,431                       | 29,870,732                       | 38,330,375                    | 43,960,102                    | 20,557,114                    | 1,519,398                   | 1,498,243                   | 1,614,323                   | 1,743,708                            | 1,515,700                            | 913,765                              | 1,671,070                            | 940,309                              | 2,038,728                            |
| tRNA                                       | 422,791                 | 369,034                 | 529,776                 | 839,309                          | 210,800                          | 307,788                          | 334,210                       | 263,325                       | 255,662                       | 77,451                      | 38,152                      | 84,717                      | 141,801                              | 62,659                               | 57,181                               | 151,954                              | 29,560                               | 151,485                              |
| Intron                                     | 396,705                 | 399,477                 | 1,112,931               | 411,726                          | 473,852                          | 627,556                          | 401,804                       | 387,468                       | 754,289                       | 5,927,207                   | 8,353,759                   | 7,478,120                   | 6,142,088                            | 7,144,008                            | 3,416,603                            | 8,472,938                            | 3,243,547                            | 6,968,664                            |
| Intergenic                                 | 2,065,518               | 2,115,265               | 6,159,693               | 6,616,628                        | 1,562,808                        | 4,736,640                        | 2,070,663                     | 2,345,988                     | 5,402,891                     | 29,684,320                  | 45,533,052                  | 23,385,552                  | 27,628,240                           | 40,226,286                           | 36,420,438                           | 42,405,602                           | 21,405,092                           | 34,858,117                           |
| Others                                     | 27,869,321              | 32,320,807              | 60,261,460              | 161,078,092                      | 14,828,118                       | 53,763,052                       | 26,355,916                    | 23,325,166                    | 36,083,155                    | 18,402,463                  | 35,214,744                  | 15,805,992                  | 25,235,043                           | 40,422,486                           | 23,442,154                           | 21,685,172                           | 41,077,270                           | 31,185,786                           |
| Total Reads                                | 78,538,989              | 103,941,083             | 130,980,756             | 243,382,145                      | 105,409,798                      | 113,437,980                      | 81,881,324                    | 81,623,538                    | 88,549,718                    | 101,252,271                 | 141,375,625                 | 69,676,707                  | 114,688,454                          | 143,206,719                          | 92,636,343                           | 131,307,738                          | 88,598,443                           | 96,911,633                           |
| adaptor-only were removed from total count |                         |                         |                         |                                  |                                  |                                  |                               |                               |                               |                             |                             |                             |                                      |                                      |                                      |                                      |                                      |                                      |

**Supplemental Table 4.**

Clinical information of FMCD patients and control cases.

| Patient ID | Age | Sex    | Age at first seizure | Age at surgery | Seizure frequency | Tissue region | Etc                |
|------------|-----|--------|----------------------|----------------|-------------------|---------------|--------------------|
| UMB1712    | 20Y | male   | -                    | -              | -                 | Frontal       | Postmortem tissues |
| UMB4917    | 22Y | male   | -                    | -              | -                 | Frontal       | Postmortem tissues |
| UMB5309    | 14Y | female | -                    | -              | -                 | Temporal      | Postmortem tissues |
| UMB5408    | 6Y  | male   | -                    | -              | -                 | Temporal      | Postmortem tissues |
| FCD56      | 10Y | female | 2Y                   | 6Y             | 3/day             | Frontal       | -                  |
| FCD247     | 11Y | female | 1Y                   | 9Y             | N.A.              | Temporal      | -                  |
| FCD254     | 12Y | male   | 4Y                   | 9Y             | 10/day            | Frontal       | -                  |
| FCD348     | 6Y  | male   | 4Y                   | 5Y             | N.A.              | Frontal       | -                  |
| HME20      | 5Y  | female | 2M                   | 9M             | 10/day            | Frontal       | -                  |
| HME255     | 20Y | female | 8Y                   | 17Y            | 3/day             | Temporal      | -                  |
| HME338     | 17Y | female | 5Y                   | 15Y            | N.A.              | Temporal      | -                  |
| TSC2       | 8Y  | female | 2Y                   | 4Y             | N.A.              | Temporal      | -                  |
| TSC264     | 2Y  | female | 1Y                   | 1Y             | 6/day             | Frontal       | -                  |
| TSC357     | 20Y | male   | 1Y                   | 18Y            | N.A.              | Frontal       | -                  |

**Supplemental Table 5.**

mTOR pathway mutations found in FMCD patients

| Patient ID | Sequencing                         | Mutation type | Mutated gene | Nucleotide changes | Protein change | Reference | Altered read | Frequency (%) |
|------------|------------------------------------|---------------|--------------|--------------------|----------------|-----------|--------------|---------------|
| TSC2       | Whole exome sequencing             | Germline      | <i>TSC2</i>  | c.3355C>T          | p.Gln1119*     | 74        | 43           | 36.75         |
| FCD254     | Targeted hybrid capture sequencing | Somatic       | <i>MTOR</i>  | c.4376C>A          | p.Ala1459Asp   | 882       | 30           | 3.29          |
| HME255     | Targeted hybrid capture sequencing | Somatic       | <i>MTOR</i>  | c.4448G>A          | p.Cys1483Tyr   | 836       | 87           | 9.43          |
| TSC264     | Targeted hybrid capture sequencing | Germline      | <i>TSC2</i>  | c.3007delG         | p.Ala1003fs    | 2282      | 278          | 10.86         |
| TSC357     | Targeted hybrid capture sequencing | Germline      | <i>TSC2</i>  | c.5153A>C          | p.His1718Pro   | 2792      | 1313         | 31.99         |

437 Supplemental Table 7.

438 Mapping distributions of read counts for the assigned classes in the Ribo-seq and RNA-seq libraries of C1483Y cells, Torin1 cells, and

439 control cells.

| Percent                                                                |                              |                              |                              |                                |                                |                                |                             |                             |                             |                                  |                                  |                                  |                                    |                                    |                                    |                                    |                                 |                                 |
|------------------------------------------------------------------------|------------------------------|------------------------------|------------------------------|--------------------------------|--------------------------------|--------------------------------|-----------------------------|-----------------------------|-----------------------------|----------------------------------|----------------------------------|----------------------------------|------------------------------------|------------------------------------|------------------------------------|------------------------------------|---------------------------------|---------------------------------|
| Class                                                                  | RPF<br>control 1st replicate | RPF<br>control 2nd replicate | RPF<br>control 3rd replicate | RPF<br>Torin1 1st<br>replicate | RPF<br>Torin1 2nd<br>replicate | RPF<br>Torin1 3rd<br>replicate | RPF<br>C1483Y 1st replicate | RPF<br>C1483Y 2nd replicate | RPF<br>C1483Y 3rd replicate | RNA-seq<br>control 1st replicate | RNA-seq<br>control 2nd replicate | RNA-seq<br>control 3rd replicate | RNA-seq<br>Torin1 1st<br>replicate | RNA-seq<br>Torin1 2nd<br>replicate | RNA-seq<br>Torin1 3rd<br>replicate | RNA-seq<br>C1483Y 1st<br>replicate | RNA-seq<br>C1483Y 2nd replicate | RNA-seq<br>C1483Y 3rd replicate |
| GDS                                                                    | 14.72%                       | 34.79%                       | 15.48%                       | 17.83%                         | 18.56%                         | 22.90%                         | 6.38%                       | 6.31%                       | 3.86%                       | 32.30%                           | 21.50%                           | 21.50%                           | 13.59%                             | 37.03%                             | 32.62%                             | 3.31%                              | 4.48%                           | 5.41%                           |
| UTR                                                                    | 2.26%                        | 1.90%                        | 1.08%                        | 7.42%                          | 1.56%                          | 4.99%                          | 1.43%                       | 0.95%                       | 2.60%                       | 10.35%                           | 9.66%                            | 9.66%                            | 13.96%                             | 5.41%                              | 12.50%                             | 0.63%                              | 0.58%                           | 0.73%                           |
| rRNA                                                                   | 79.96%                       | 48.59%                       | 37.65%                       | 69.11%                         | 64.53%                         | 55.54%                         | 59.45%                      | 63.97%                      | 65.57%                      | 1.65%                            | 1.65%                            | 1.19%                            | 1.39%                              | 2.86%                              | 0.75%                              | 1.04%                              | 0.96%                           | 0.64%                           |
| intron                                                                 | 0.17%                        | 0.48%                        | 0.35%                        | 0.24%                          | 0.19%                          | 0.66%                          | 0.90%                       | 0.27%                       | 0.38%                       | 0.04%                            | 0.04%                            | 0.03%                            | 0.02%                              | 0.09%                              | 0.07%                              | 0.11%                              | 0.09%                           | 0.10%                           |
| Intergenic                                                             | 0.16%                        | 0.57%                        | 0.27%                        | 0.28%                          | 0.08%                          | 0.81%                          | 0.26%                       | 0.30%                       | 0.15%                       | 4.26%                            | 4.26%                            | 4.53%                            | 4.89%                              | 2.89%                              | 3.48%                              | 1.65%                              | 2.07%                           | 2.55%                           |
| Others                                                                 | 1.88%                        | 1.82%                        | 1.95%                        | 1.81%                          | 1.86%                          | 1.77%                          | 1.81%                       | 1.81%                       | 1.81%                       | 26.86%                           | 26.86%                           | 26.86%                           | 26.86%                             | 23.47%                             | 24.48%                             | 48.39%                             | 21.48%                          | 29.48%                          |
| Total Reads                                                            | 84544560                     | 126553842                    | 86026712                     | 6845284                        | 10502722                       | 117489790                      | 67639196                    | 76325689                    | 322620203                   | 131345936                        | 68919162                         | 109355253                        | 86019698                           | 132446004                          | 99045697                           | 99045697                           | 106717153                       |                                 |
| Too-short, non-clipped, and adaptor-only were removed from total count |                              |                              |                              |                                |                                |                                |                             |                             |                             |                                  |                                  |                                  |                                    |                                    |                                    |                                    |                                 |                                 |

| Read count                                                             |                              |                              |                              |                |                |                |                             |                             |                             |                                  |                                  |                                  |                                  |                                  |                                  |                                 |                                 |                                 |
|------------------------------------------------------------------------|------------------------------|------------------------------|------------------------------|----------------|----------------|----------------|-----------------------------|-----------------------------|-----------------------------|----------------------------------|----------------------------------|----------------------------------|----------------------------------|----------------------------------|----------------------------------|---------------------------------|---------------------------------|---------------------------------|
| Class                                                                  | RPF<br>control 1st replicate | RPF<br>control 2nd replicate | RPF<br>control 3rd replicate | RPF<br>1st 1st | RPF<br>1st 2nd | RPF<br>1st 3rd | RPF<br>C1483Y 1st replicate | RPF<br>C1483Y 2nd replicate | RPF<br>C1483Y 3rd replicate | RNA-seq<br>control 1st replicate | RNA-seq<br>control 2nd replicate | RNA-seq<br>control 3rd replicate | RNA-seq<br>control 1st replicate | RNA-seq<br>control 2nd replicate | RNA-seq<br>control 3rd replicate | RNA-seq<br>C1483Y 1st replicate | RNA-seq<br>C1483Y 2nd replicate | RNA-seq<br>C1483Y 3rd replicate |
| GDS                                                                    | 12,444,778                   | 44,047,852                   | 13,316,688                   | 12,455,249     | 19,489,475     | 26,509,780     | 4,330,316                   | 4,848,522                   | 4,457,937                   | 20,669,878                       | 69,391,984                       | 42,430,223                       | 9,330,081                        | 40,489,913                       | 29,410,775                       | 4,403,984                       | 4,438,927                       | 5,758,864                       |
| UTR                                                                    | 1,906,633                    | 2,408,183                    | 931,792                      | 5,182,850      | 1,636,167      | 5,865,303      | 970,968                     | 420,378                     | 3,004,013                   | 7,867,164                        | 31,197,801                       | 18,330,940                       | 3,728,412                        | 15,231,851                       | 11,556,820                       | 836,686                         | 574,542                         | 777,675                         |
| rRNA                                                                   | 67,005,641                   | 61,515,585                   | 32,365,272                   | 49,271,061     | 67,773,005     | 66,252,417     | 40,330,493                  | 49,129,378                  | 75,701,188                  | 1,261,073                        | 3,838,643                        | 1,820,533                        | 1,860,453                        | 819,758                          | 927,610                          | 2,013,234                       | 941,504                         | 689,068                         |
| Intron                                                                 | 145,049                      | 686,121                      | 303,432                      | 189,462        | 184,861        | 709,228        | 811,800                     | 203,921                     | 410,889                     | 34,232                           | 154,148                          | 32,211                           | 35,480                           | 10,568                           | 86,703                           | 152,425                         | 193,897                         | 183,332                         |
| Intergenic                                                             | 798,791                      | 3,274,620                    | 1,200,064                    | 1,051,627      | 31,106,043     | 2,769,509      | 1,200,929                   | 2,367,085                   | 1,471,001                   | 21,102,642                       | 79,486,104                       | 42,036,243                       | 14,503,437                       | 20,940,461                       | 22,319,403                       | 26,573,529                      | 21,038,989                      | 23,786,910                      |
| Others                                                                 | 1,563,739                    | 13,716,088                   | 37,656,598                   | 2,521,739      | 12,103,026     | 15,007,936     | 19,890,714                  | 19,564,092                  | 30,230,418                  | 22,102,877                       | 122,827,226                      | 17,266,597                       | 37,507,294                       | 26,098,172                       | 22,228,248                       | 64,073,266                      | 69,341,402                      | 72,888,483                      |
| Total Reads                                                            | 84,544,560                   | 126,553,842                  | 86,026,712                   | 68,452,842     | 105,027,222    | 117,489,790    | 67,639,196                  | 76,325,689                  | 322,620,203                 | 131,345,936                      | 68,919,162                       | 109,355,253                      | 86,019,698                       | 132,446,004                      | 99,045,697                       | 99,045,697                      | 106,717,153                     |                                 |
| Too-short, non-clipped, and adaptor-only were removed from total count |                              |                              |                              |                |                |                |                             |                             |                             |                                  |                                  |                                  |                                  |                                  |                                  |                                 |                                 |                                 |

449 **Supplemental Table 12.**

450 Upstream analysis of mTOR activation-sensitive genes in C1483Y cells.

| Upstream Regulator | Molecule Type         | Predicted Activation State | Activation z-score | p-value of overlap | Target molecules in dataset  |
|--------------------|-----------------------|----------------------------|--------------------|--------------------|------------------------------|
| EIF4E              | translation regulator | Activated                  | 2.236              | 0.00271            | ATOX1,BIRC6,CDC34,CKS2,NUDT3 |

451

452

453

454

455

456

457

458

459

460

461

462

463

464

**Supplemental Table 13.**

Summary of 5' UTR motifs (E-score) identified in subset of mTOR activation-sensitive genes.

| 5' UTR motif       | <i>Adk-S</i> | <i>Creb1</i> | <i>IRSp53</i> | <i>Atox1</i> | <i>Birc6</i> | <i>Cdc34</i> | <i>Cks2</i> | <i>Nudt3</i> |
|--------------------|--------------|--------------|---------------|--------------|--------------|--------------|-------------|--------------|
| (GGC) <sub>4</sub> | 9.07E-05     | 7.90E-06     |               |              |              | 5.10E-05     |             | 5.51E-06     |
| U-rich             |              |              | 4.61E-05      |              |              |              |             |              |
| A-rich             |              | 1.58E-05     |               |              |              |              |             |              |
| CERT               |              | 6.69E-05     |               | 1.34E-05     | 7.42E-05     | 1.76E-06     |             | 2.99E-05     |

**Supplemental Table 2. (Separate file)**

Log2 ratio of fold changes in the translational efficiencies (TEs) of mTOR p.C1483Y and mTOR p.L2427P mice relative to mTOR WT mice with z-score.

**Supplemental Table 3. (Separate file)**

mTOR activation-sensitive genes in FMCD mice.

**Supplemental Table 6. (Separate file)**

5' TOP mRNAs and log2 ratio of fold changes in the translational efficiencies (TEs) of mTOR p.C1483Y and mTOR p.L2427P mice relative to mTOR WT mice.

**Supplemental Table 8. (Separate file)**

Log2 ratios of fold changes in the translational efficiencies (TEs) of C1483Y and Torin1 cells relative to control cells with z-score.

**Supplemental Table 9. (Separate file)**

5' TOP mRNAs and log2 ratios of fold changes in the translational efficiencies (TEs) of C1483Y cells and Torin1 cells relative to control cells.

**Supplemental Table 10. (Separate file)**

Length, GC content, and Gibbs free energy change of 5' UTRs of mTOR activation- and inhibition-sensitive genes in FMCD mice, C1483Y, and Torin 1 cells.

**Supplemental Table 11. (Separate file)**



mTOR activation- and inhibition-sensitive genes with identified 5' UTRs motifs.

**Supplemental Table 14. (Separate file)**

The sequence of 5' UTRs and motifs in *Adk-S*, *IRSp53*, and *Creb1* that are deleted in 5' UTR reporter assay.
